# Supplementary material for: Gender diversity in UK surgical specialties: a national observational study
Source: HighWire-hosted journal article supplement (doi:10.1136/bmjopen-2021-055516), 2022-02-01
Supplement: bmjopen-2021-055516supp001_data_supplement.pdf [file bmjopen-2021-055516supp001_data_supplement.pdf]

Supplementary Table 1

| Registrars              | 2011  | 2012  | 2013  | 2014  | 2015  | 2016  | 2017  | 2018  | 2019  | 2020  |
|-------------------------|-------|-------|-------|-------|-------|-------|-------|-------|-------|-------|
| Cardiothoracic Surgery  |       |       |       |       |       |       |       |       |       |       |
| Total                   | 380   | 380   | 385   | 375   | 375   | 375   | 350   | 320   | 315   | 305   |
| Female ( <i>N</i> )     | 55    | 55    | 80    | 80    | 80    | 80    | 70    | 65    | 55    | 65    |
| Female (%)              | 14.5  | 14.5  | 20.8  | 21.3  | 21.3  | 21.3  | 20    | 20.3  | 17.5  | 21.3  |
| General Surgery         |       |       |       |       |       |       |       |       |       |       |
| Total                   | 1,615 | 1,590 | 1,605 | 1,645 | 1,620 | 1,645 | 1,640 | 1,605 | 1,575 | 1,645 |
| Female ( <i>N</i> )     | 420   | 425   | 450   | 485   | 505   | 530   | 570   | 570   | 565   | 655   |
| Female (%)              | 26.0  | 26.7  | 28.0  | 29.5  | 31.2  | 32.2  | 34.8  | 35.5  | 35.9  | 39.8  |
| Neurosurgery            |       |       |       |       |       |       |       |       |       |       |
| Total                   | 325   | 310   | 325   | 340   | 345   | 350   | 375   | 380   | 400   | 385   |
| Female ( <i>N</i> )     | 65    | 60    | 70    | 80    | 70    | 80    | 80    | 95    | 100   | 95    |
| Female (%)              | 20    | 19.4  | 21.5  | 23.5  | 20.3  | 22.9  | 21.3  | 25    | 25    | 24.7  |
| Ophthalmology           |       |       |       |       |       |       |       |       |       |       |
| Total                   | 750   | 755   | 840   | 805   | 730   | 760   | 760   | 695   | 700   | 715   |
| Female ( <i>N</i> )     | 310   | 315   | 335   | 350   | 315   | 350   | 370   | 325   | 340   | 355   |
| Female (%)              | 41.3  | 41.7  | 39.9  | 43.5  | 43.2  | 46.1  | 48.7  | 46.8  | 48.6  | 49.7  |
| Otolaryngology          |       |       |       |       |       |       |       |       |       |       |
| Total                   | 460   | 420   | 450   | 470   | 430   | 460   | 500   | 495   | 520   | 550   |
| Female ( <i>N</i> )     | 175   | 165   | 160   | 185   | 175   | 195   | 225   | 220   | 240   | 265   |
| Female (%)              | 38    | 39.3  | 35.6  | 39.4  | 40.7  | 42.4  | 45    | 44.4  | 46.2  | 48.2  |
| Paediatric Surgery      |       |       |       |       |       |       |       |       |       |       |
| Total                   | 155   | 160   | 160   | 155   | 150   | 165   | 170   | 160   | 170   | 165   |
| Female ( <i>N</i> )     | 70    | 65    | 65    | 70    | 70    | 80    | 80    | 80    | 80    | 75    |
| Female (%)              | 45.2  | 40.6  | 40.6  | 45.2  | 46.7  | 48.5  | 47.1  | 50.0  | 47.1  | 45.5  |
| Plastic Surgery         |       |       |       |       |       |       |       |       |       |       |
| Total                   | 405   | 400   | 400   | 405   | 410   | 420   | 435   | 420   | 410   | 450   |
| Female ( <i>N</i> )     | 120   | 130   | 145   | 150   | 155   | 175   | 175   | 185   | 175   | 190   |
| Female (%)              | 29.6  | 32.5  | 36.3  | 37    | 37.8  | 41.7  | 40.2  | 44    | 42.7  | 42.2  |
| Trauma and Orthopaedics |       |       |       |       |       |       |       |       |       |       |
| Total                   | 1,630 | 1,615 | 1,695 | 1,685 | 1,735 | 1,770 | 1,680 | 1,700 | 1,725 | 1,725 |
| Female ( <i>N</i> )     | 250   | 235   | 285   | 310   | 325   | 330   | 310   | 325   | 345   | 355   |
| Female (%)              | 15.3  | 14.6  | 16.8  | 18.4  | 18.7  | 18.6  | 18.5  | 19.1  | 20    | 20.6  |
| Urology                 |       |       |       |       |       |       |       |       |       |       |
| Total                   | 400   | 395   | 425   | 430   | 440   | 425   | 440   | 435   | 470   | 475   |
| Female ( <i>N</i> )     | 85    | 90    | 90    | 110   | 125   | 125   | 135   | 130   | 150   | 150   |
| Female (%)              | 21.3  | 22.8  | 21.2  | 25.6  | 28.4  | 29.4  | 30.7  | 29.9  | 31.9  | 31.6  |
| Vascular Surgery        |       |       |       |       |       |       |       |       |       |       |
| Total                   | -     | -     | -     | 25    | 60    | 70    | 60    | 85    | 105   | 120   |
| Female ( <i>N</i> )     | -     | -     | -     | 5     | 15    | 20    | 20    | 25    | 30    | 30    |
| Female (%)              | -     | -     | -     | 20    | 25    | 28.6  | 33.3  | 29.4  | 28.6  | 25    |

Supplementary Table 2

| Consultants             | 2011  | 2012  | 2013  | 2014  | 2015  | 2016  | 2017  | 2018  | 2019  | 2020  |
|-------------------------|-------|-------|-------|-------|-------|-------|-------|-------|-------|-------|
| Cardiothoracic Surgery  |       |       |       |       |       |       |       |       |       |       |
| Total                   | 320   | 330   | 345   | 350   | 355   | 360   | 380   | 390   | 405   | 415   |
| Female (N)              | 20    | 20    | 20    | 20    | 25    | 25    | 30    | 35    | 40    | 45    |
| Female (%)              | 6.3   | 6.1   | 5.8   | 5.7   | 7     | 6.9   | 7.9   | 9     | 9.9   | 10.8  |
| General Surgery         |       |       |       |       |       |       |       |       |       |       |
| Total                   | 1,985 | 2,065 | 2,150 | 2,195 | 2,225 | 2,330 | 2,410 | 2,465 | 2,515 | 2,625 |
| Female (N)              | 215   | 240   | 275   | 305   | 320   | 360   | 370   | 410   | 430   | 460   |
| Female (%)              | 10.8  | 11.6  | 12.8  | 13.9  | 14.4  | 15.5  | 15.4  | 16.6  | 17.1  | 17.5  |
| Neurosurgery            |       |       |       |       |       |       |       |       |       |       |
| Total                   | 230   | 250   | 270   | 280   | 295   | 310   | 320   | 335   | 360   | 365   |
| Female (N)              | 15    | 15    | 20    | 20    | 20    | 25    | 20    | 25    | 30    | 30    |
| Female (%)              | 6.5   | 6     | 7.4   | 7.1   | 6.8   | 8.1   | 6.3   | 7.5   | 8.3   | 8.2   |
| Ophthalmology           |       |       |       |       |       |       |       |       |       |       |
| Total                   | 1,075 | 1,105 | 1,140 | 1,165 | 1,240 | 1,280 | 1,340 | 1,380 | 1,445 | 1,495 |
| Female (N)              | 250   | 265   | 285   | 300   | 330   | 360   | 385   | 420   | 445   | 485   |
| Female (%)              | 23.3  | 24    | 25.0  | 25.8  | 26.6  | 28.1  | 28.7  | 30.4  | 30.8  | 32.4  |
| Otolaryngology          |       |       |       |       |       |       |       |       |       |       |
| Total                   | 600   | 595   | 610   | 640   | 675   | 710   | 730   | 750   | 775   | 795   |
| Female (N)              | 60    | 65    | 70    | 85    | 90    | 100   | 105   | 120   | 130   | 135   |
| Female (%)              | 10    | 10.9  | 11.5  | 13.3  | 13.3  | 14.1  | 14.4  | 16    | 16.8  | 17    |
| Paediatric Surgery      |       |       |       |       |       |       |       |       |       |       |
| Total                   | 145   | 145   | 165   | 190   | 195   | 200   | 190   | 185   | 190   | 205   |
| Female (N)              | 30    | 35    | 40    | 50    | 50    | 50    | 50    | 50    | 45    | 65    |
| Female (%)              | 20.7  | 24.1  | 24.2  | 26.3  | 25.6  | 25    | 26.3  | 27    | 23.7  | 31.7  |
| Plastic Surgery         |       |       |       |       |       |       |       |       |       |       |
| Total                   | 365   | 390   | 405   | 430   | 455   | 485   | 500   | 510   | 530   | 550   |
| Female (N)              | 60    | 65    | 65    | 75    | 80    | 90    | 100   | 110   | 110   | 115   |
| Female (%)              | 16.4  | 16.7  | 16    | 17.4  | 17.6  | 18.6  | 20    | 21.6  | 20.8  | 20.9  |
| Trauma and Orthopaedics |       |       |       |       |       |       |       |       |       |       |
| Total                   | 2,120 | 2,180 | 2,240 | 2,320 | 2,390 | 2,455 | 2,545 | 2,590 | 2,670 | 2,750 |
| Female (N)              | 90    | 105   | 120   | 130   | 140   | 150   | 165   | 170   | 185   | 200   |
| Female (%)              | 4.2   | 4.8   | 5.4   | 5.6   | 5.9   | 6.1   | 6.5   | 6.6   | 6.9   | 7.3   |
| Urology                 |       |       |       |       |       |       |       |       |       |       |
| Total                   | 670   | 685   | 710   | 735   | 800   | 850   | 875   | 920   | 955   | 985   |
| Female (N)              | 45    | 50    | 55    | 55    | 65    | 70    | 80    | 95    | 110   | 115   |
| Female (%)              | 6.7   | 7.3   | 7.7   | 7.5   | 8.1   | 8.2   | 9.1   | 10.3  | 11.5  | 11.7  |
| Vascular Surgery        |       |       |       |       |       |       |       |       |       |       |
| Total                   | -     | -     | -     | 80    | 130   | 155   | 160   | 195   | 235   | 255   |
| Female (N)              | -     | -     | -     | 5     | 10    | 15    | 20    | 25    | 30    | 35    |
| Female (%)              | -     | -     | -     | 6.3   | 7.7   | 9.7   | 12.5  | 12.8  | 12.8  | 13.7  |
